# Supplementary material for: Capture and detection of Escherichia coli with graphene aerogels
Source: Royal Society of Chemistry journal article supplement (doi:10.1039/d2tb01749k), 2022-01-01
Supplement: d2tb01749k1.pdf [file d2tb01749k1.pdf]

## Supporting Information

# Capture and Detection of Escherichia coli with Graphene Aerogels

Chenyang Shi <sup>a</sup>, Yanan Tang <sup>c</sup>, Hanyu Yang <sup>a</sup>, Junfeng Yang <sup>a</sup>, Yuyang Wu <sup>a</sup>, Hang Sun <sup>c</sup>, Shengyan Yin <sup>a,\*</sup> and Guangbin Wang <sup>b,\*</sup>

*<sup>a</sup>State Key Laboratory of Integrated Optoelectronics, College of Electronic Science and Engineering, Jilin University, Changchun, Jilin 130012, P. R. China.*

*<sup>b</sup>Department of Orthopedics, Shengjing Hospital of China Medical University, Shenyang, Liaoning, 110004, P. R. China.*

*<sup>c</sup>Key Laboratory of Bionic Engineering (Ministry of Education), College of Biological and Agricultural Engineering, Jilin University, Changchun, Jilin 130022, P. R. China.*

\* Corresponding author.

E-mail address: [syyin@jlu.edu.cn](mailto:syyin@jlu.edu.cn); [wanggb@sj-hospital.org](mailto:wanggb@sj-hospital.org)

**Table S1.** The fitting parameters of culture medium.

| <b>Time (min)</b> | <b>R<sub>m</sub> (ohm)</b> | <b>CPE1 (S·sec<sup>n</sup>)</b> | <b>R<sub>ct</sub> (ohm)</b> | <b>CPE2 (S·sec<sup>n</sup>)</b> | <b>C<sub>g/e</sub> (F)</b> | <b>R<sub>g/e</sub> (ohm)</b> | <b>R<sub>L</sub> (ohm)</b> |
|-------------------|----------------------------|---------------------------------|-----------------------------|---------------------------------|----------------------------|------------------------------|----------------------------|
| <b>15</b>         | 1894                       | 4.697E-7                        | 53.15                       | 0.0308                          | 0.1615                     | 0.01                         | 2.675E010                  |
| <b>30</b>         | 1859                       | 4.771E-7                        | 52.83                       | 0.03041                         | 0.1608                     | 0.258                        | 8.515E016                  |
| <b>45</b>         | 1937                       | 2.779E-7                        | 50.46                       | 0.118                           | 5.385E-8                   | 14.26                        | 1.304E009                  |
| <b>60</b>         | 1811                       | 4.587E-7                        | 52.68                       | 0.03006                         | 0.1597                     | 0.099                        | 1.889E012                  |

**Table S2.** The fitting parameters of 10000 cfu/mL *E. coli*.

| <b>Time (min)</b> | <b>R<sub>m</sub> (ohm)</b> | <b>CPE1 (S·sec<sup>n</sup>)</b> | <b>R<sub>ct</sub> (ohm)</b> | <b>CPE2 (S·sec<sup>n</sup>)</b> | <b>C<sub>g/e</sub> (F)</b> | <b>R<sub>g/e</sub> (ohm)</b> | <b>R<sub>L</sub> (ohm)</b> |
|-------------------|----------------------------|---------------------------------|-----------------------------|---------------------------------|----------------------------|------------------------------|----------------------------|
| <b>15</b>         | 42.33                      | 0.0251                          | 117.2                       | 0.1057                          | 1.65E-8                    | 27.13                        | 3.79E016                   |
| <b>30</b>         | 38.97                      | 0.0247                          | 74.53                       | 0.1038                          | 2.332E-8                   | 30.3                         | 6.869E011                  |
| <b>45</b>         | 13.43                      | 0.4259                          | 87.84                       | 0.5568                          | 3.227E-8                   | 32.49                        | 1.211E016                  |
| <b>60</b>         | 23.57                      | 0.7564                          | 76.71                       | 0.2672                          | 1.561E-8                   | 15.36                        | 1.213E008                  |
